# Supplementary material for: Effect of water content on the physical properties and structure of walnut oleogels
Source: Royal Society of Chemistry journal article supplement (doi:10.1039/d2ra00920j), 2022-01-01
Supplement: d2ra00920j1.pdf [file d2ra00920j1.pdf]

**Fig. S1.** Schematic illustration of oleogel formation.

**Fig. S2.** DSC thermographs of oleogels samples with different oil – to-water ratios

Potato starch (a), Candelilla wax (b), and Oil-to-water ratios (c).

**Fig. S3.** FTIR spectra of walnut oleogel prepared at different oil-to-water ratios (a: PS,

CW,WO; b: oil-water )

**Fig. S4.** light microscopy images prepared under different oil/water ratios. (a: 9:1; b:

8:2; c: 7:3; d: 6:4; e: 5:5) The scale bar represents 20  $\mu\text{m}$ .

**Table S1.** Herschel – Bulkley model parameters of oleogels with different oil-to-water ratios.

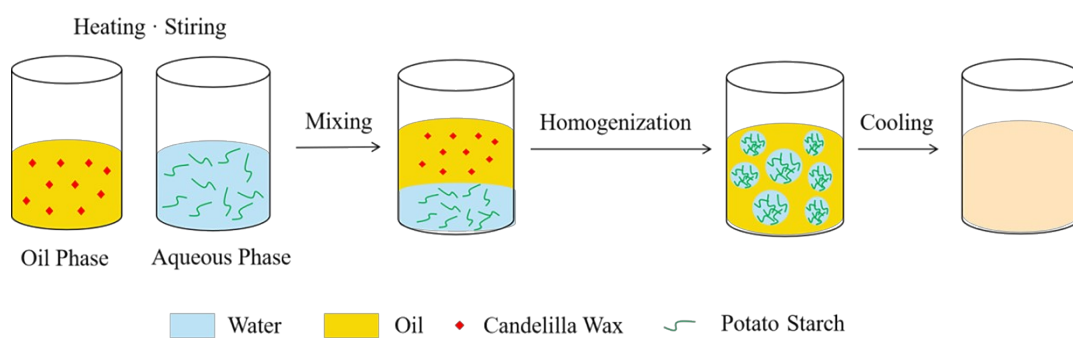

**Fig. S1** Schematic illustration of oleogel formation

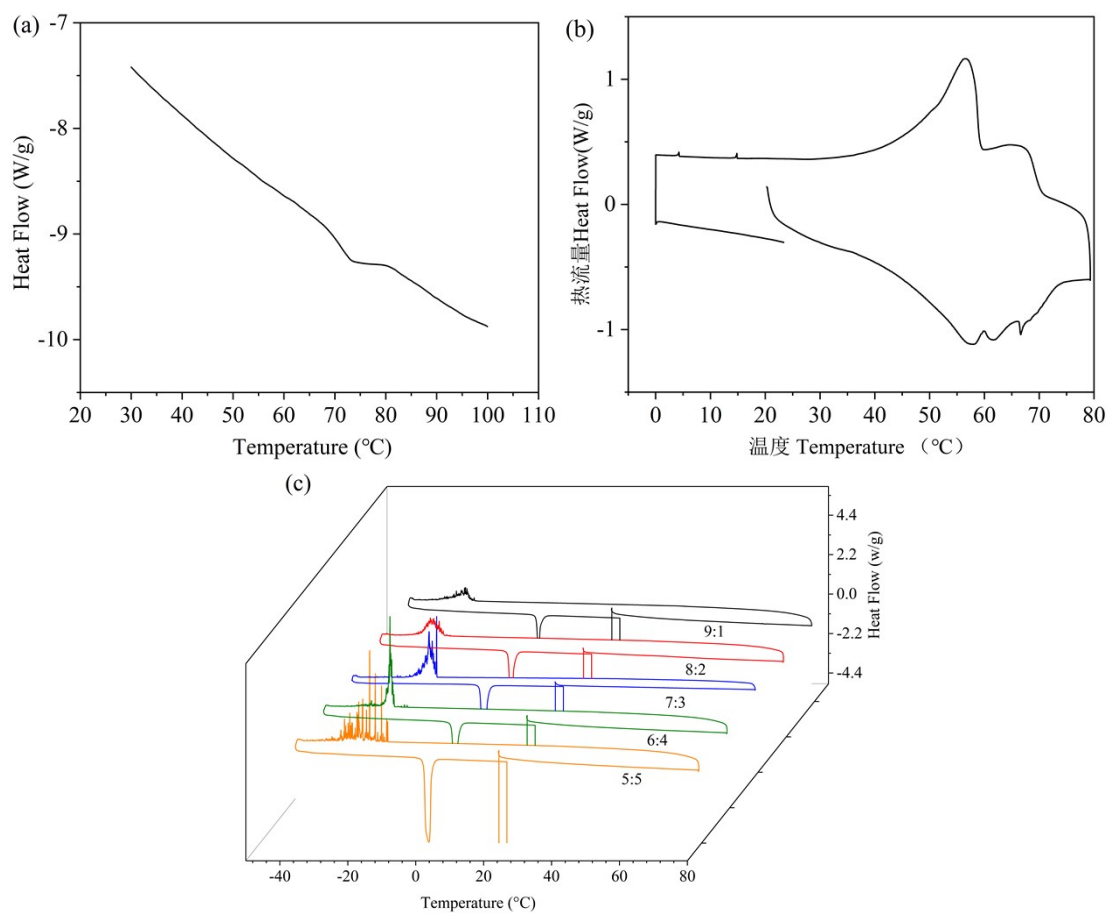

**Fig. S2** DSC thermographs of oleogel samples with different oil-to-water ratios

Potato starch (a), Candelilla wax (b), and Oil-to-water ratios (c).

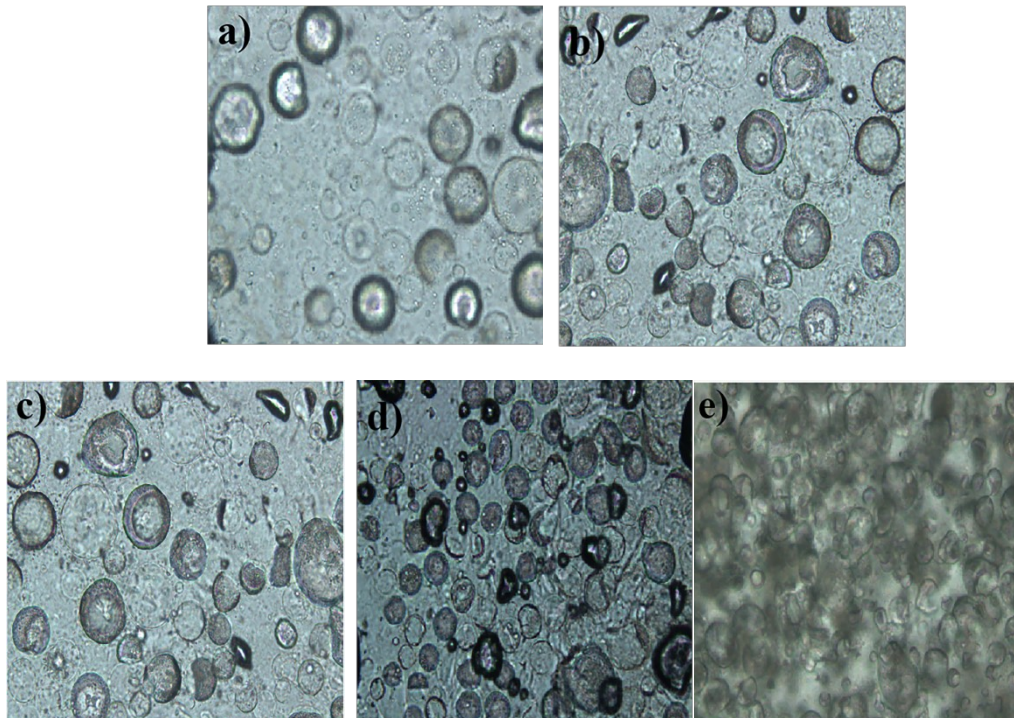

**Fig. S3** light microscopy images prepared under different oil/water ratios.

(a: 9:1; b: 8:2; c: 7:3; d: 6:4; e: 5:5) The scale bar represents 20  $\mu\text{m}$ .

**Table S1.** Herschel–Bulkley model parameters of oleogels with different oil-to-water ratios

| Oil-water ratios | Yield stress (Pa)  | $K/(\text{Pa}\cdot\text{s})$ | $n$               | $R^2$ |
|------------------|--------------------|------------------------------|-------------------|-------|
| 9:1              | $6.58 \pm 1.31^c$  | $8.32 \pm 1.33^d$            | $0.31 \pm 0.01^b$ | 0.987 |
| 8:2              | $12.16 \pm 0.95^b$ | $14.63 \pm 0.93^c$           | $0.22 \pm 0.02^c$ | 0.965 |
| 7:3              | $0.93 \pm 3.85^d$  | $17.19 \pm 3.91^b$           | $0.14 \pm 0.02^d$ | 0.985 |
| 6:4              | $0.31 \pm 0.01^e$  | $21.90 \pm 2.79^a$           | $0.12 \pm 0.04^e$ | 0.997 |
| 5:5              | $15.21 \pm 1.49^a$ | $7.32 \pm 1.41^e$            | $0.39 \pm 0.04^a$ | 0.975 |
